# Supplementary material for: Quantifying overlapping and differing information of global precipitation for GCM forecasts and El Niño–Southern Oscillation
Source: Copernicus journal article supplement (doi:10.5194/hess-26-4233-2022), 2022-08-17
Supplement: Supplementary file 1 [file hess-26-4233-2022-supplement.pdf]

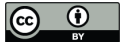

*Supplement of*

## **Quantifying overlapping and differing information of global precipitation for GCM forecasts and El Niño–Southern Oscillation**

**Tongtiegang Zhao et al.**

*Correspondence to:* Tongtiegang Zhao (zhaottg@mail.sysu.edu.cn), Haoling Chen (chenhling@mail2.sysu.edu.cn), Denghua Yan (yandh@iwhr.com), and Xiaohong Chen (eescxh@mail.sysu.edu.cn)

The copyright of individual parts of the supplement might differ from the article licence.

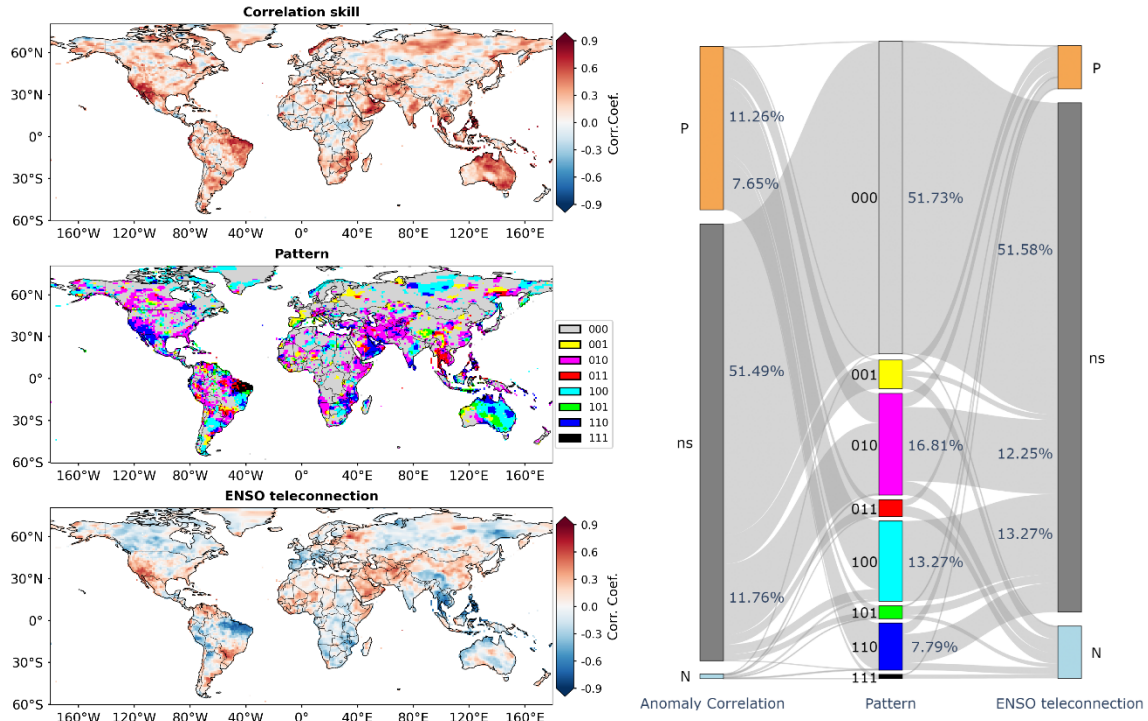

**Figure S1. As for Figure 12, but for March-April-May (MAM)**

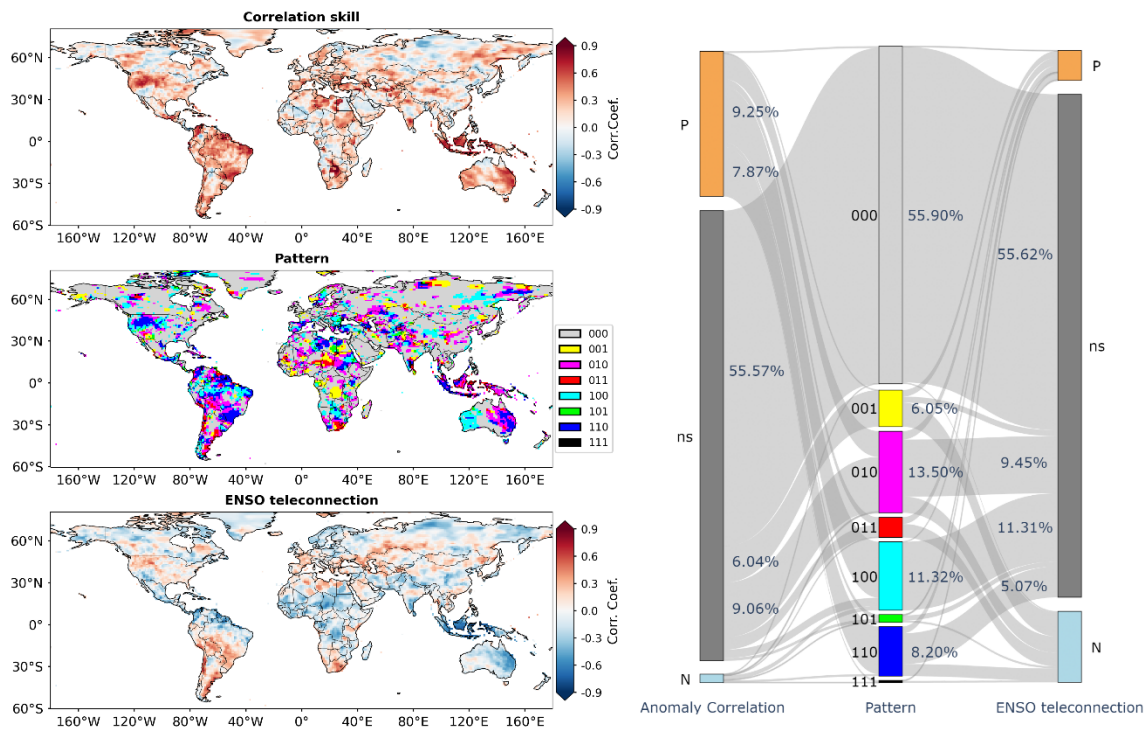

**Figure S2. As for Figure 12, but for June-July-August (JJA)**

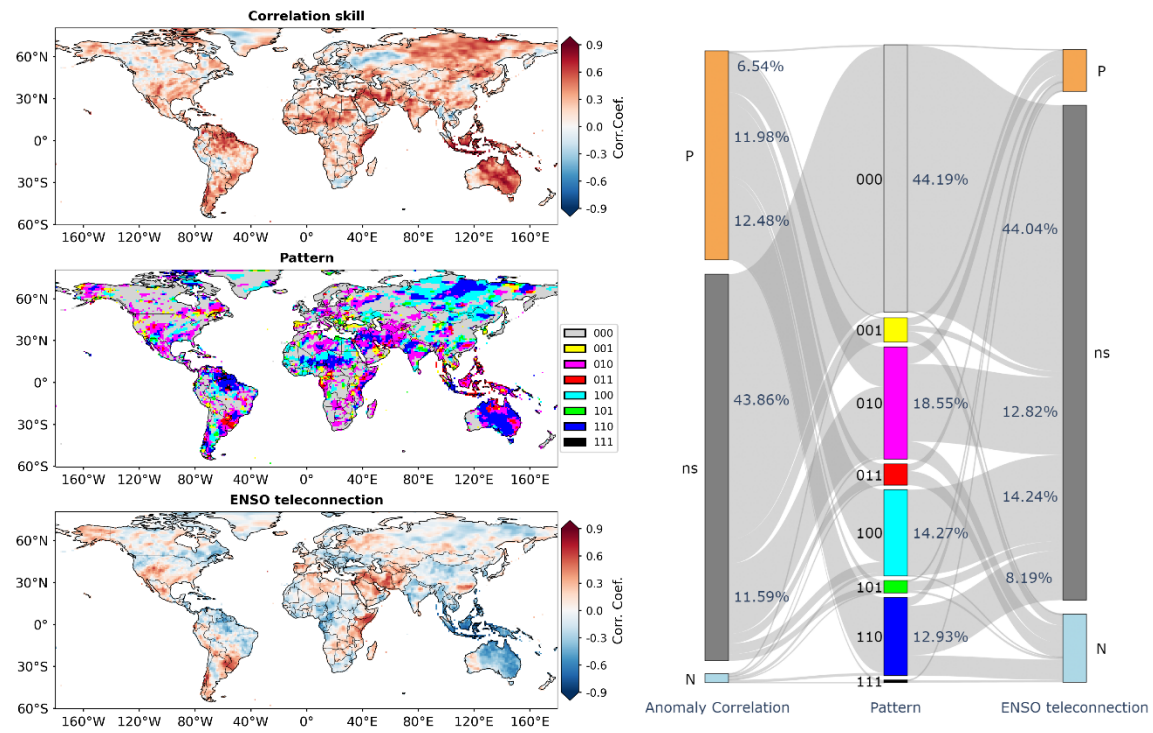

**Figure S3. As for Figure 12, but for September-October-November (SON)**

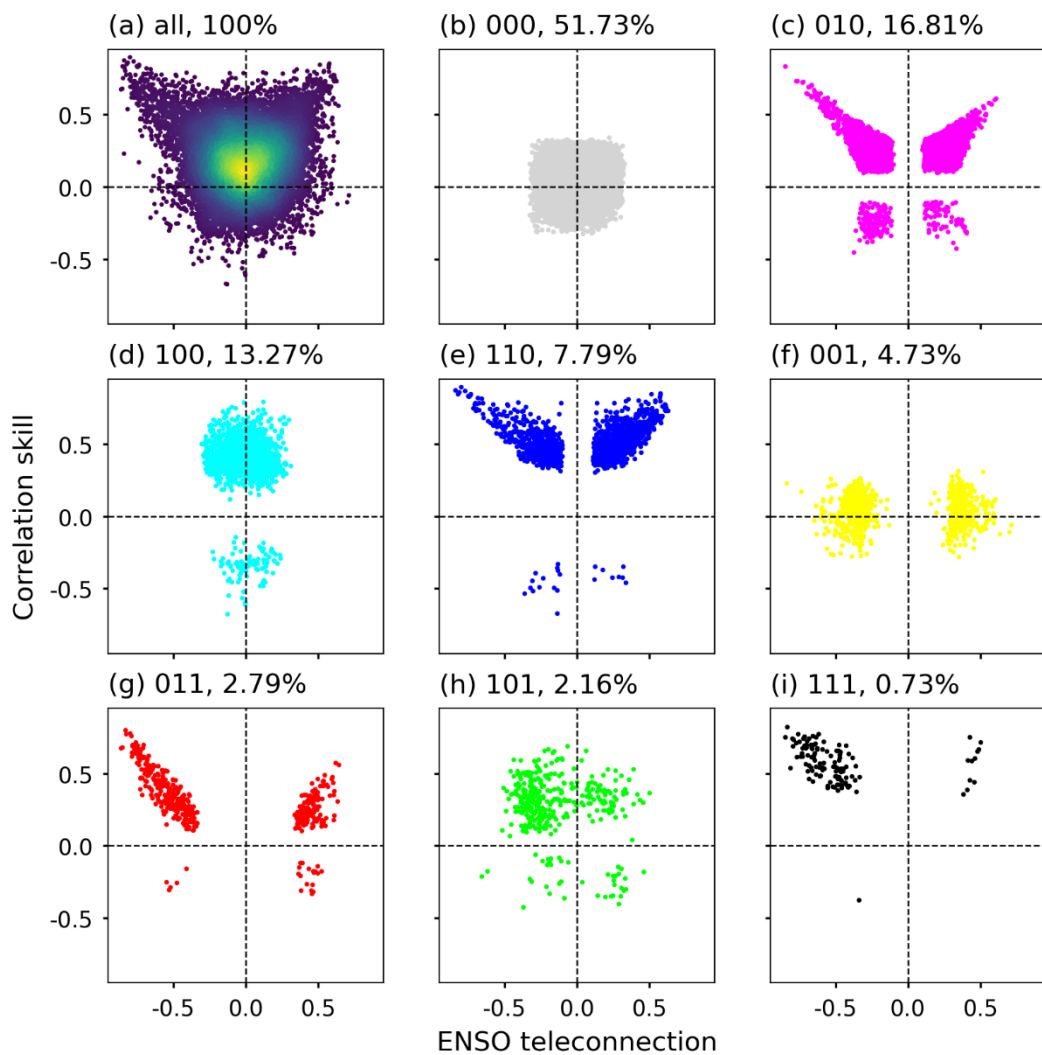

**Figure S4. As for Figure 13, but for March-April-May (MAM)**

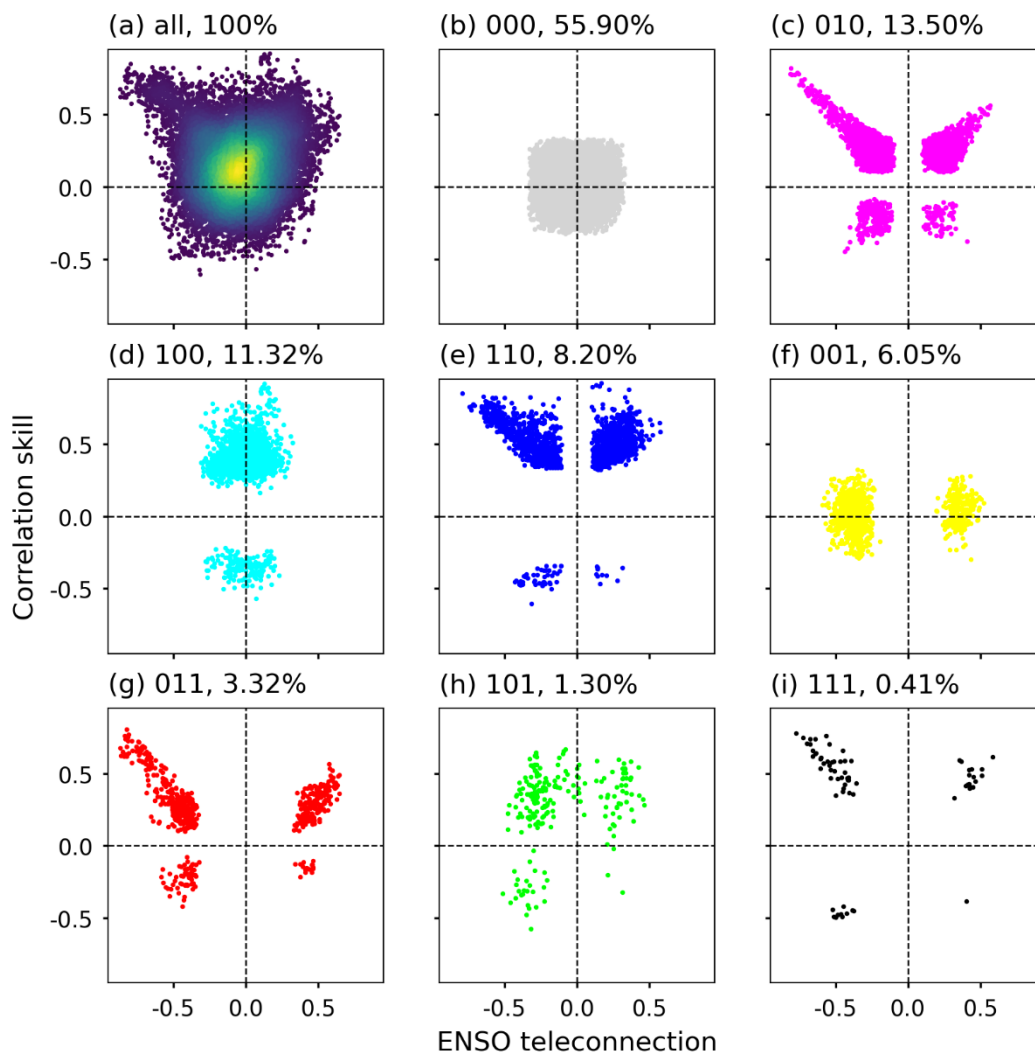

**Figure S5. As for Figure 13, but for June-July-August (JJA)**

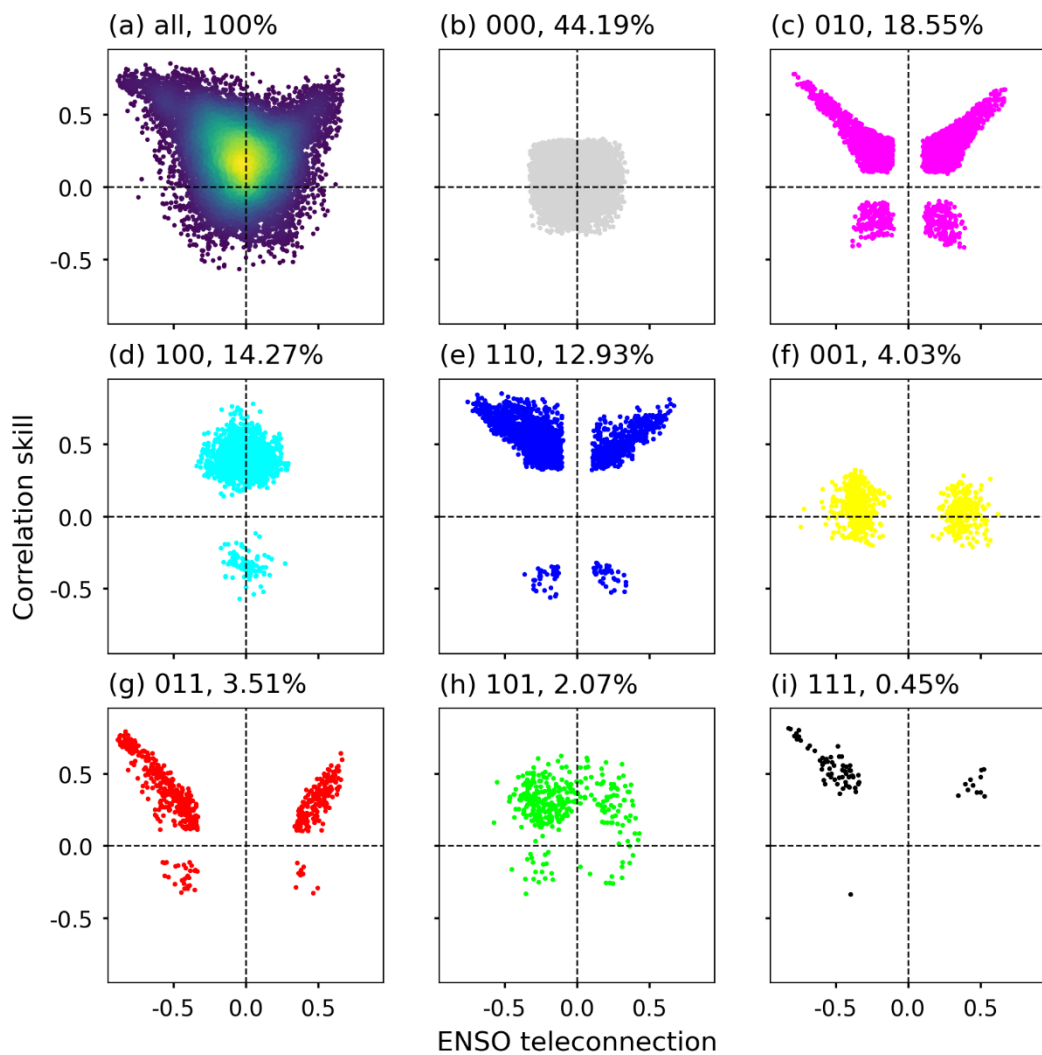

**Figure S6. As for Figure 13, but for September-October-November (SON)**

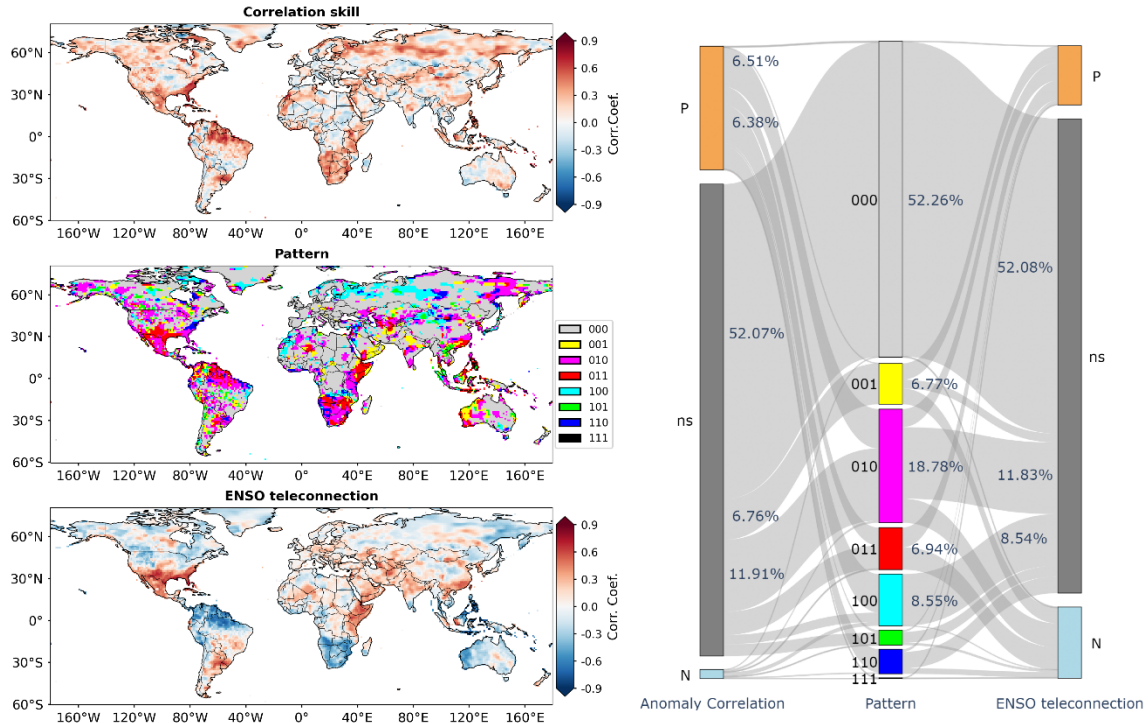

**Figure S7. As for Figure S1, but for CFSv2 forecasts at the lead time of 1 month**

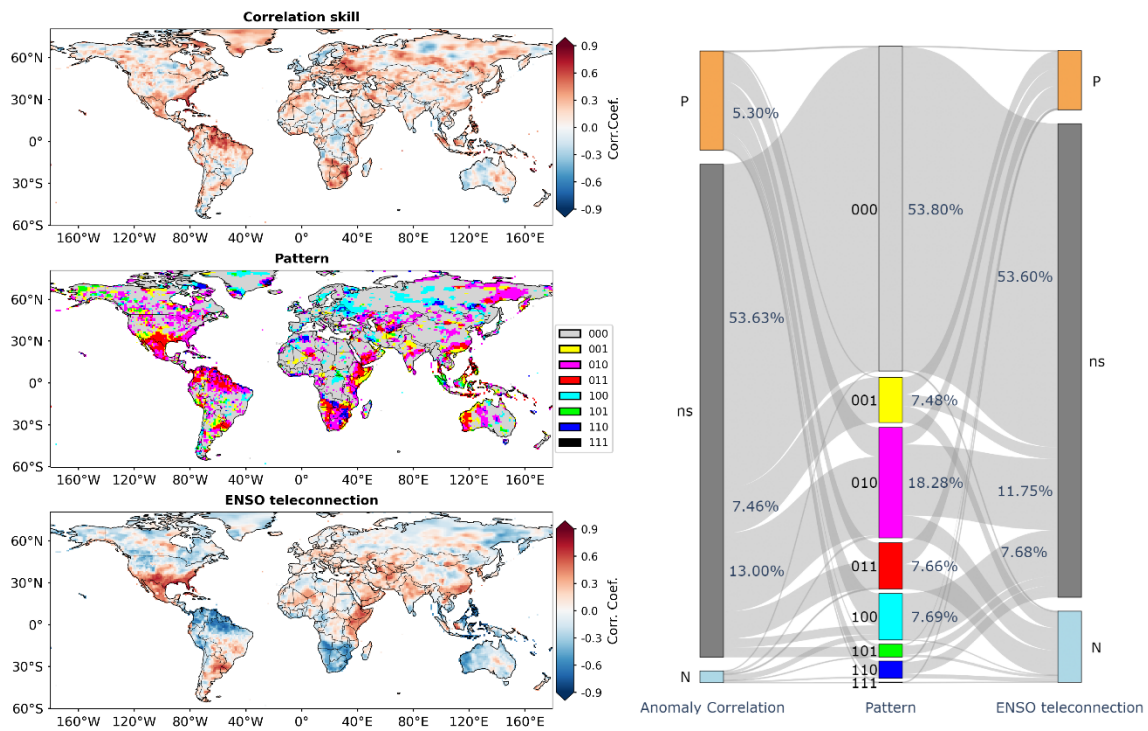

**Figure S8. As for Figure S1, but for CFSv2 forecasts at the lead time of 2 months**

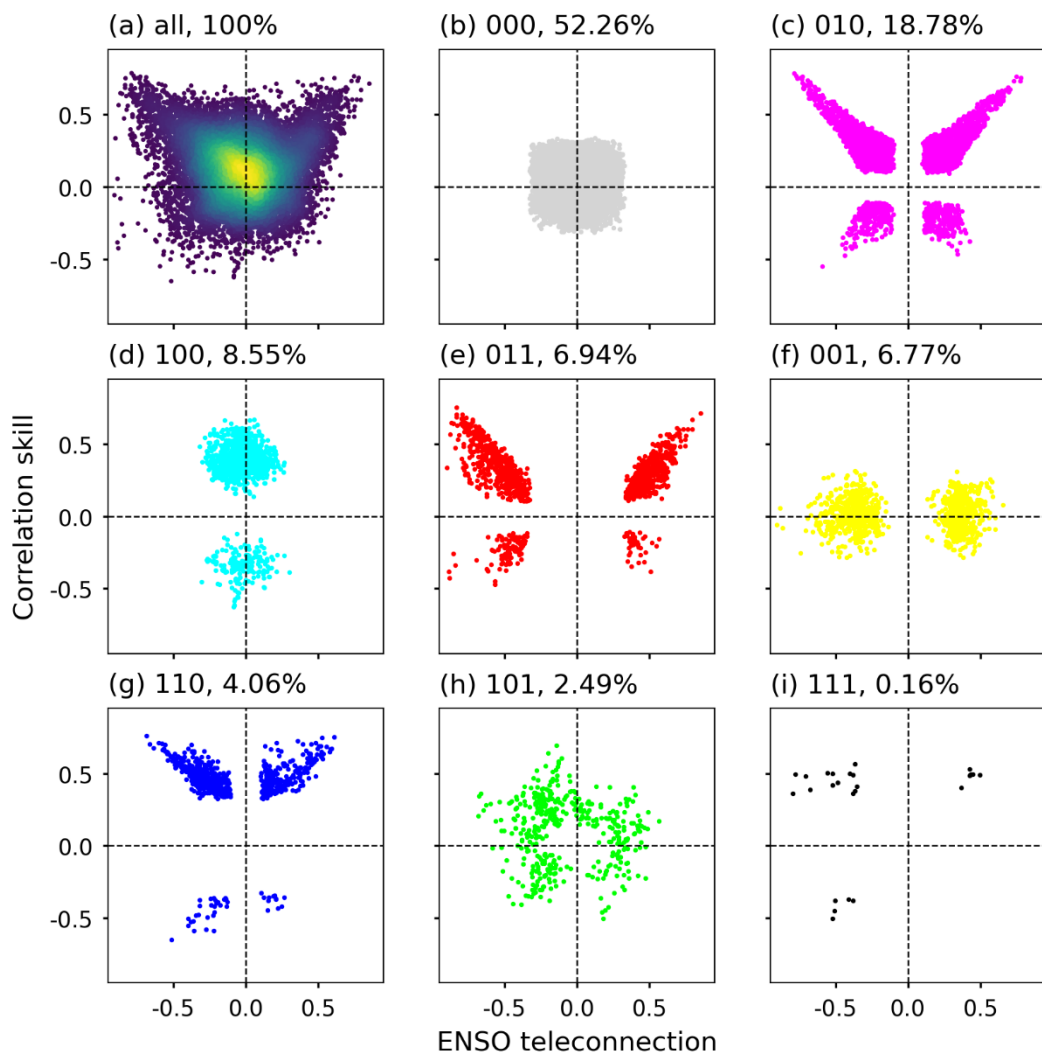

**Figure S9. As for Figure 13, but for CFSv2 forecasts at the lead time of 1 month**



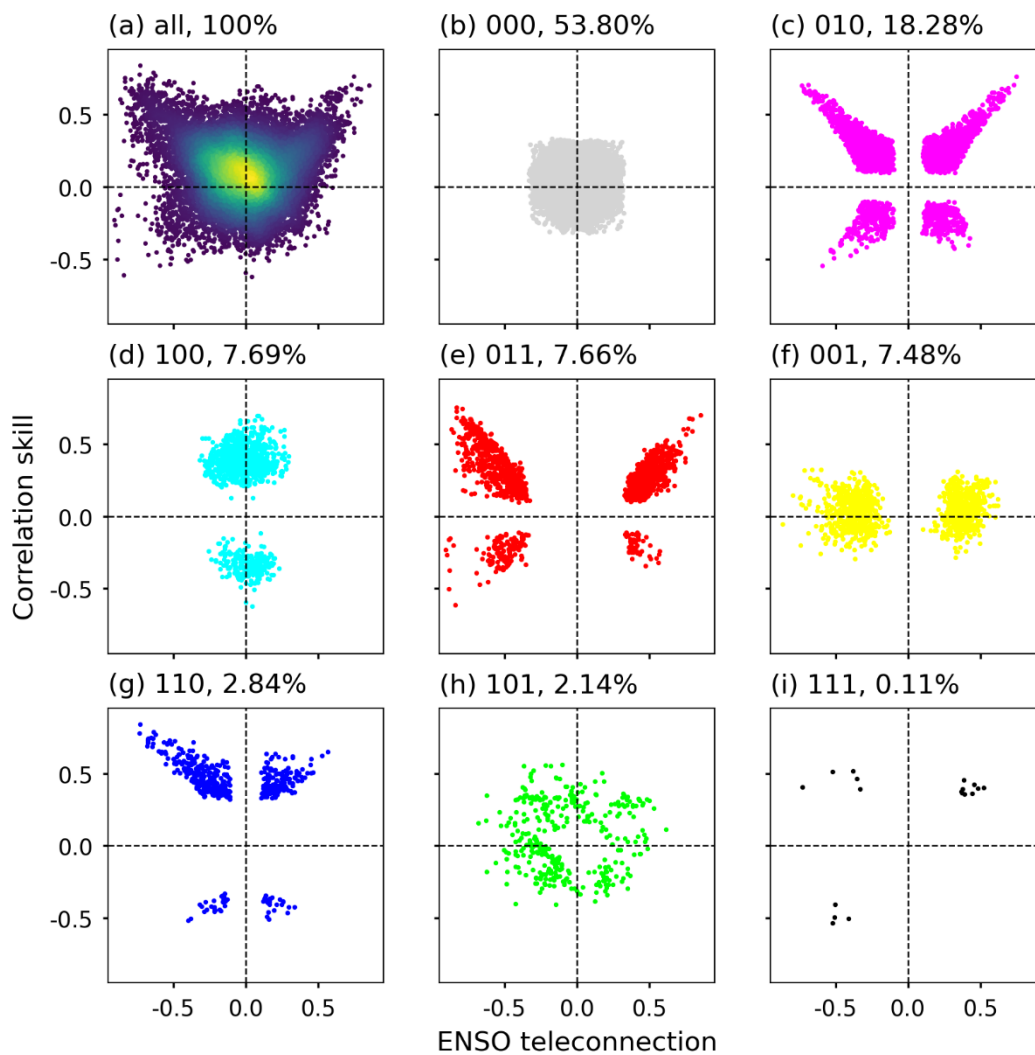

**Figure S10. As for Figure 13, but for CFSv2 forecasts at the lead time of 2 months**

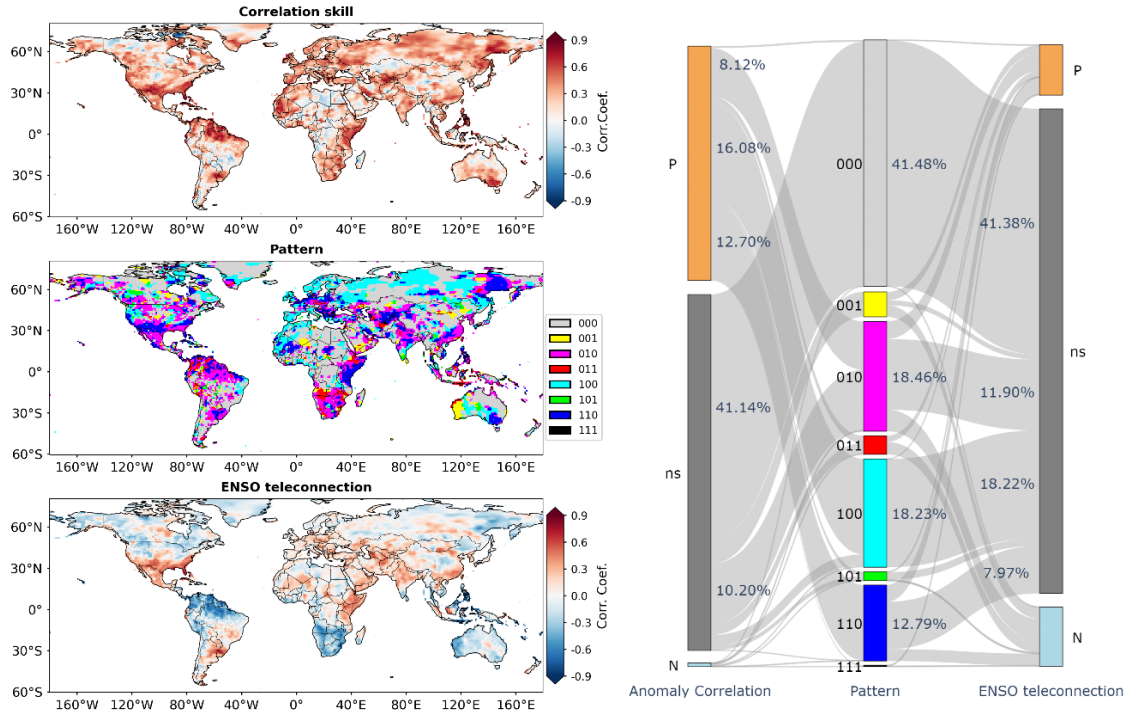

**Figure S11. As for Figure 12, but for monthly Niño3.4 index at the lag time of 1 month**

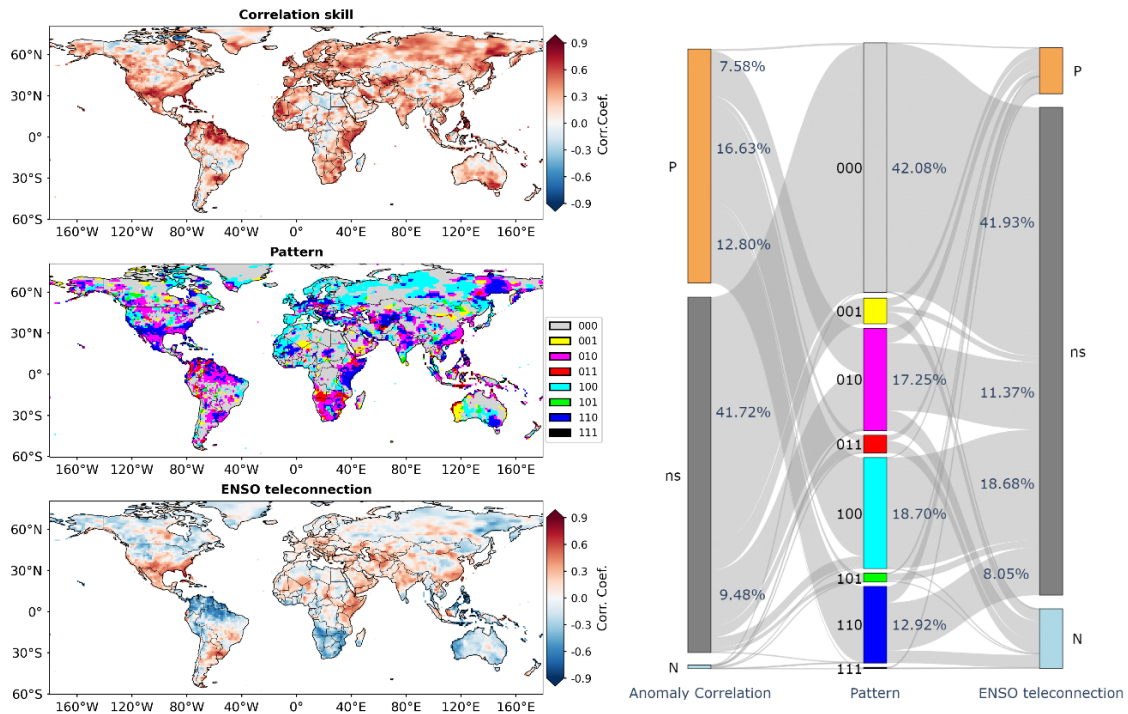

**Figure S12. As for Figure 12, but for monthly Niño3.4 index at the lag time of 2 months**

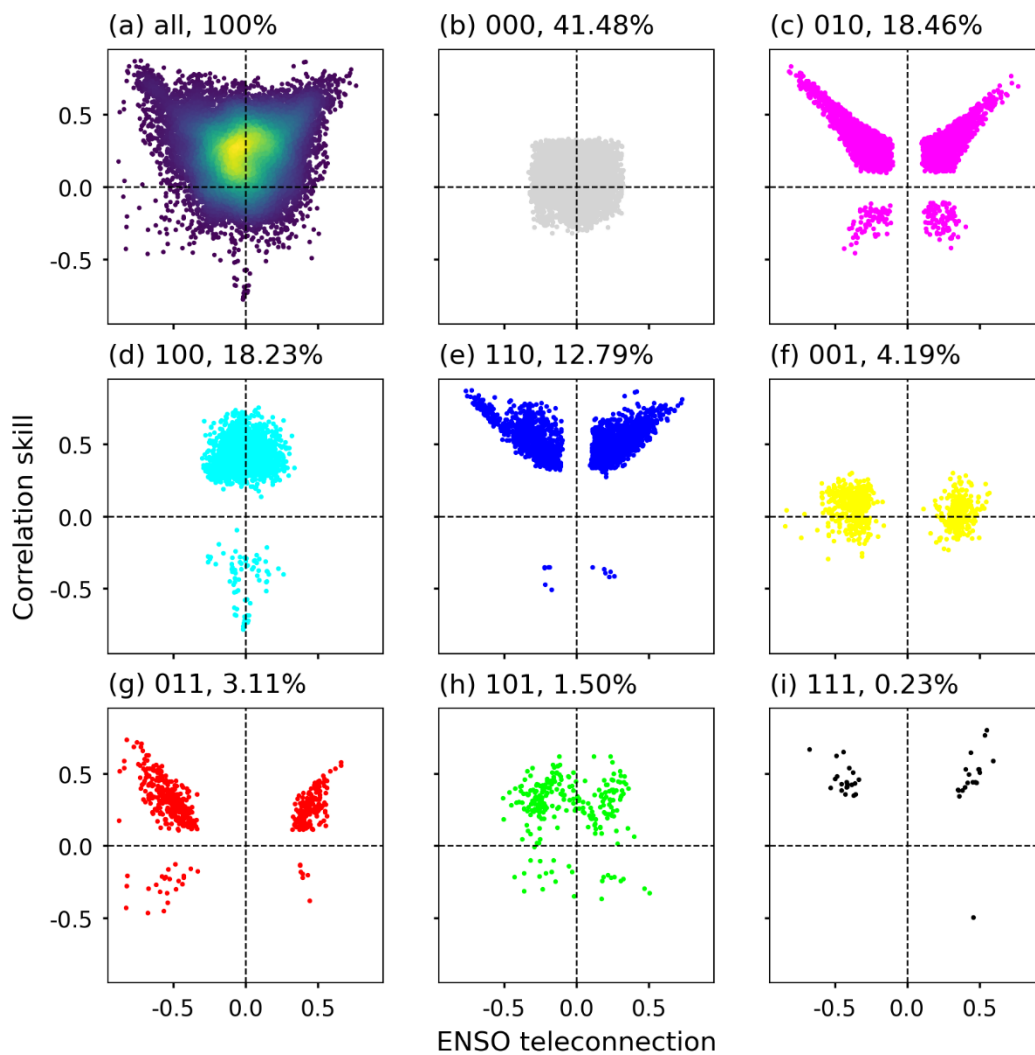

**Figure S13. As for Figure 13, but for monthly Niño3.4 index at the lag time of 1 month**

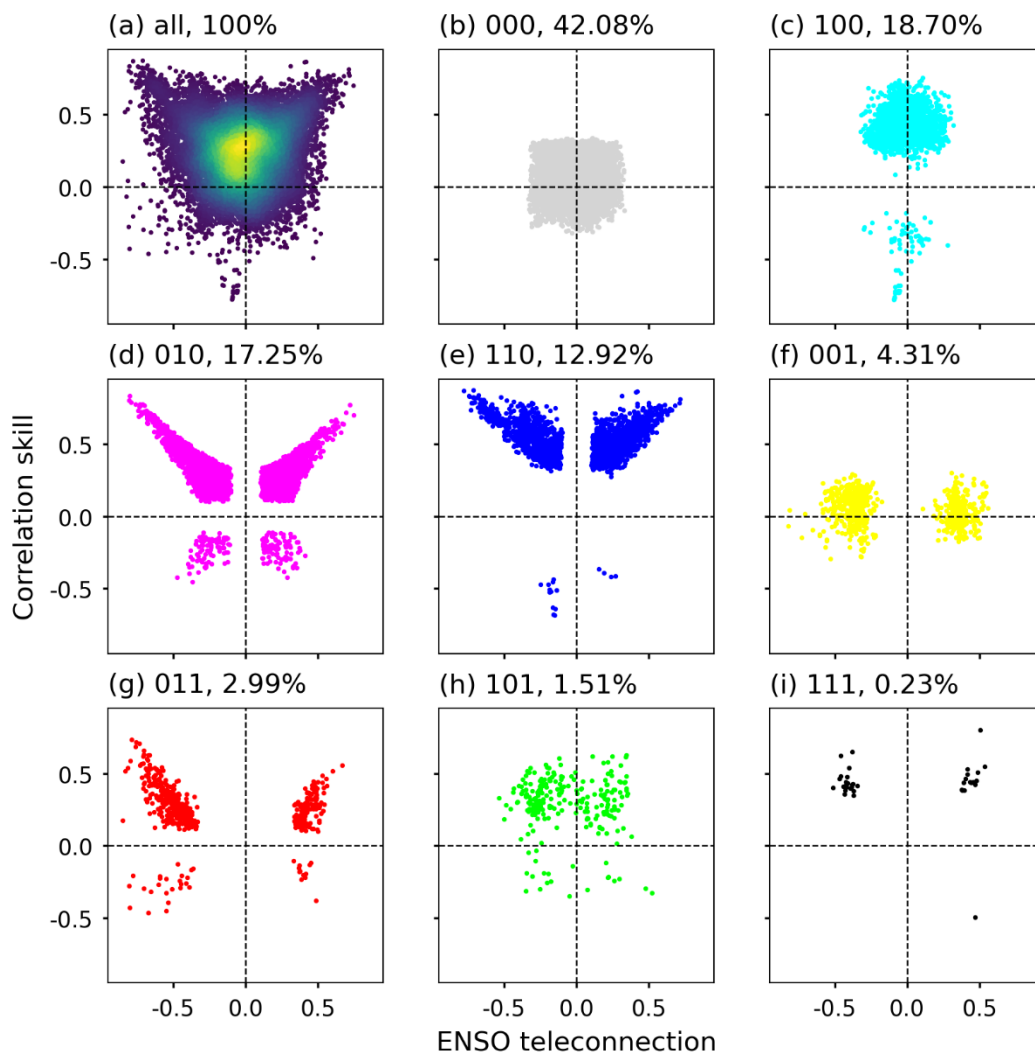

**Figure S14.** As for Figure 13, but for monthly Niño3.4 index at the lag time of 2 months



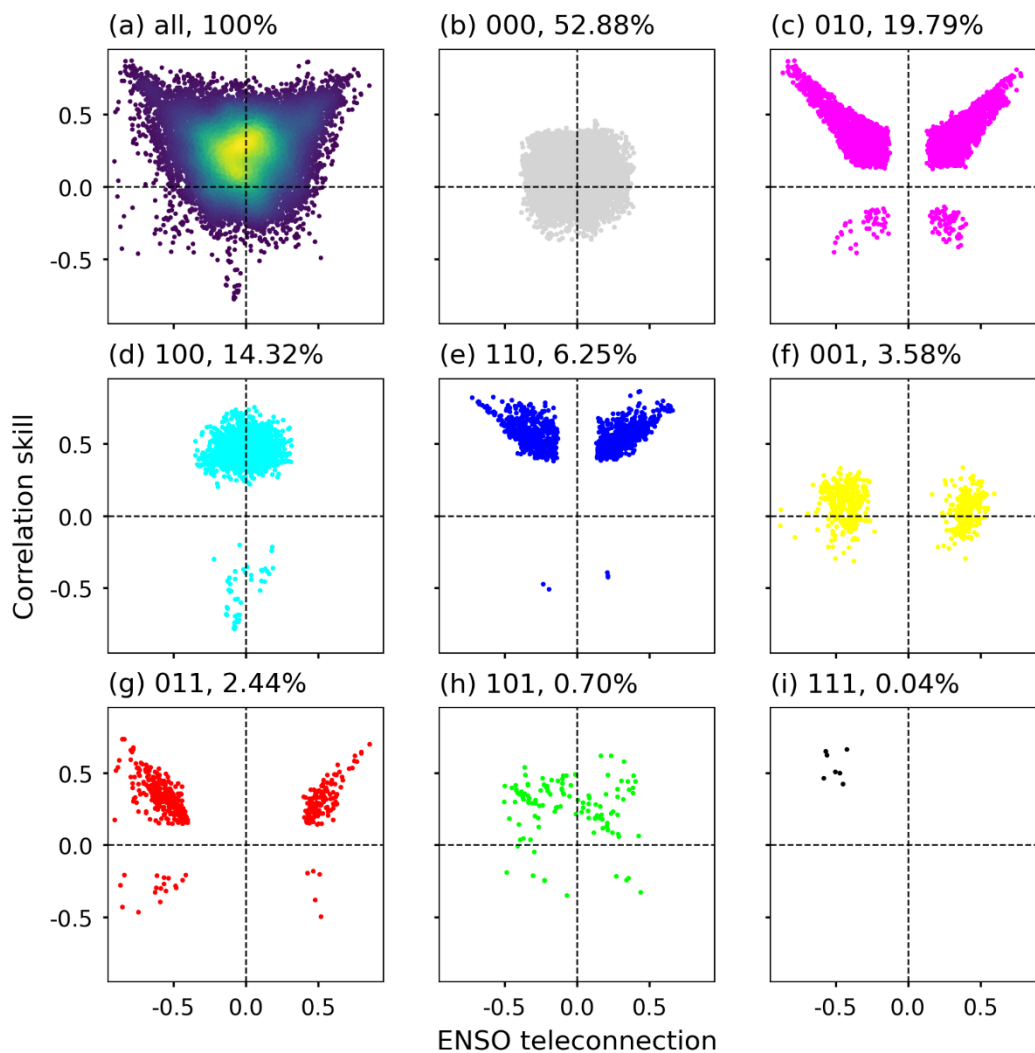

**Figure S17. As for Figure 13, but for the significance level of 0.05**

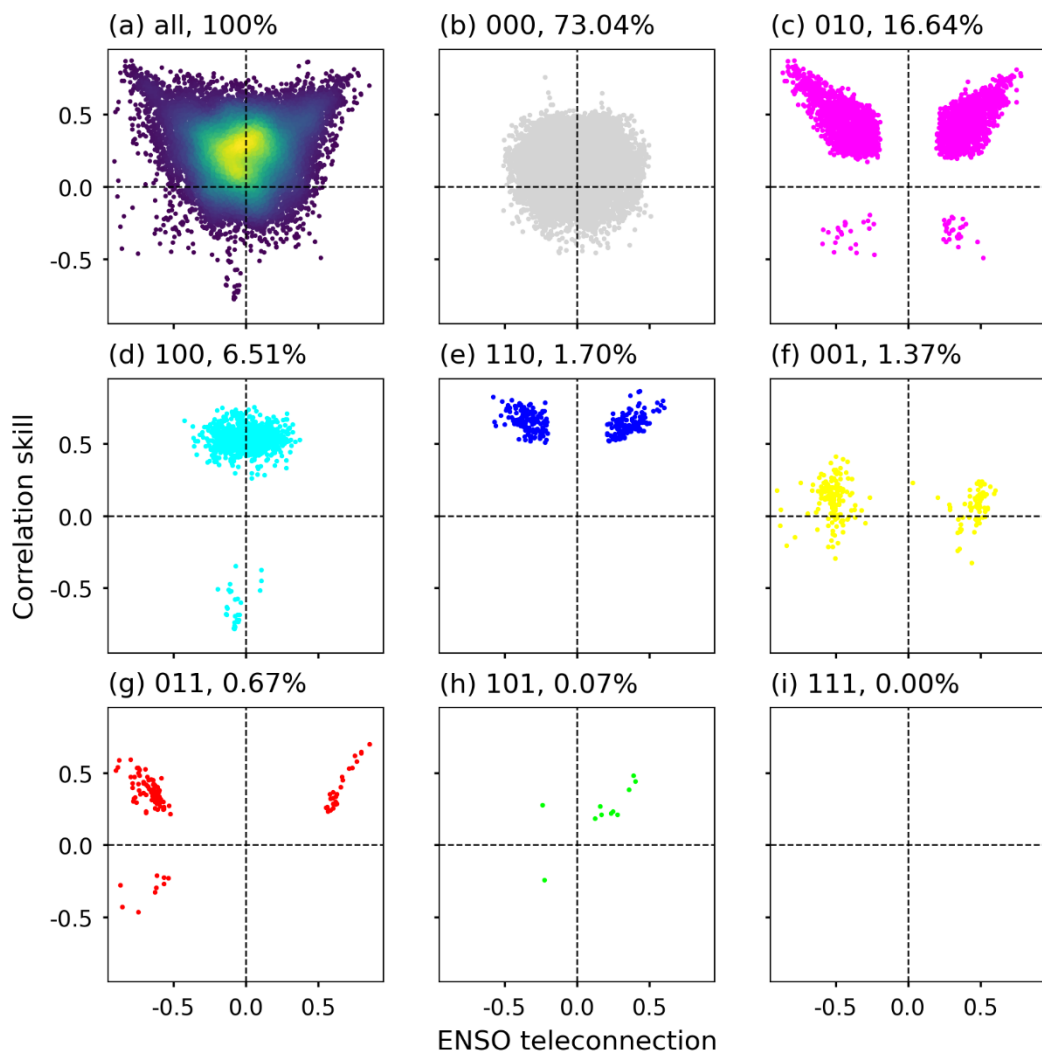

**Figure S18. As for Figure 13, but for the significance level of 0.01**



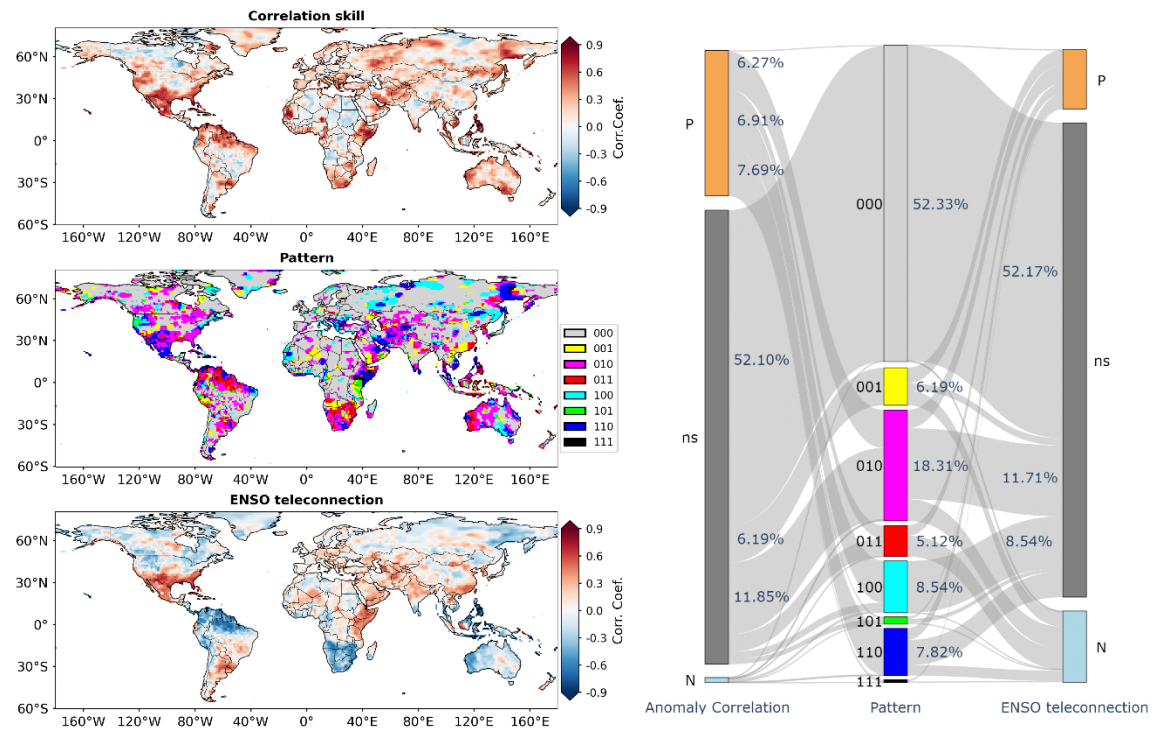

**Figure S19. As for Figure 12, but for CMC2-CanCM4 forecasts in DJF**



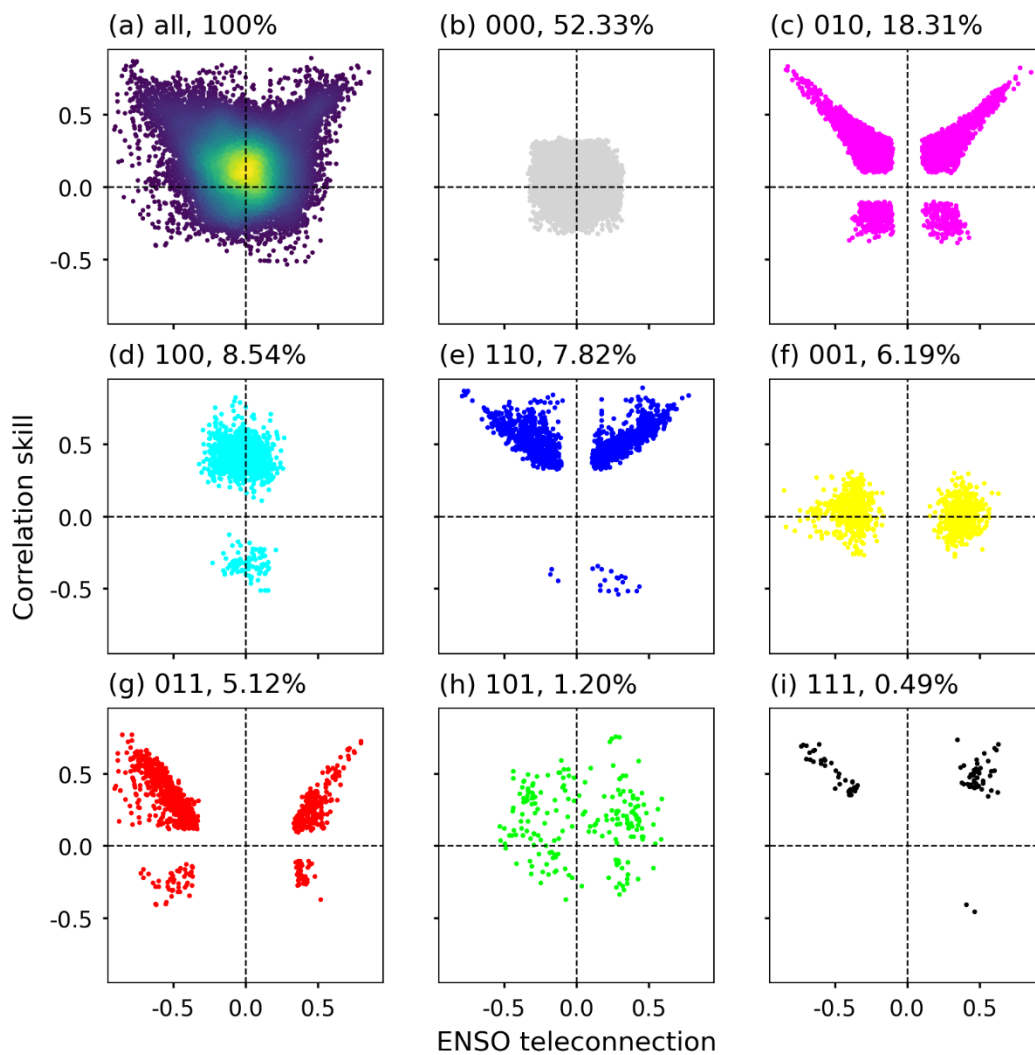

**Figure S20. As for Figure 13, but for CMC2-CanCM4 forecasts in DJF**

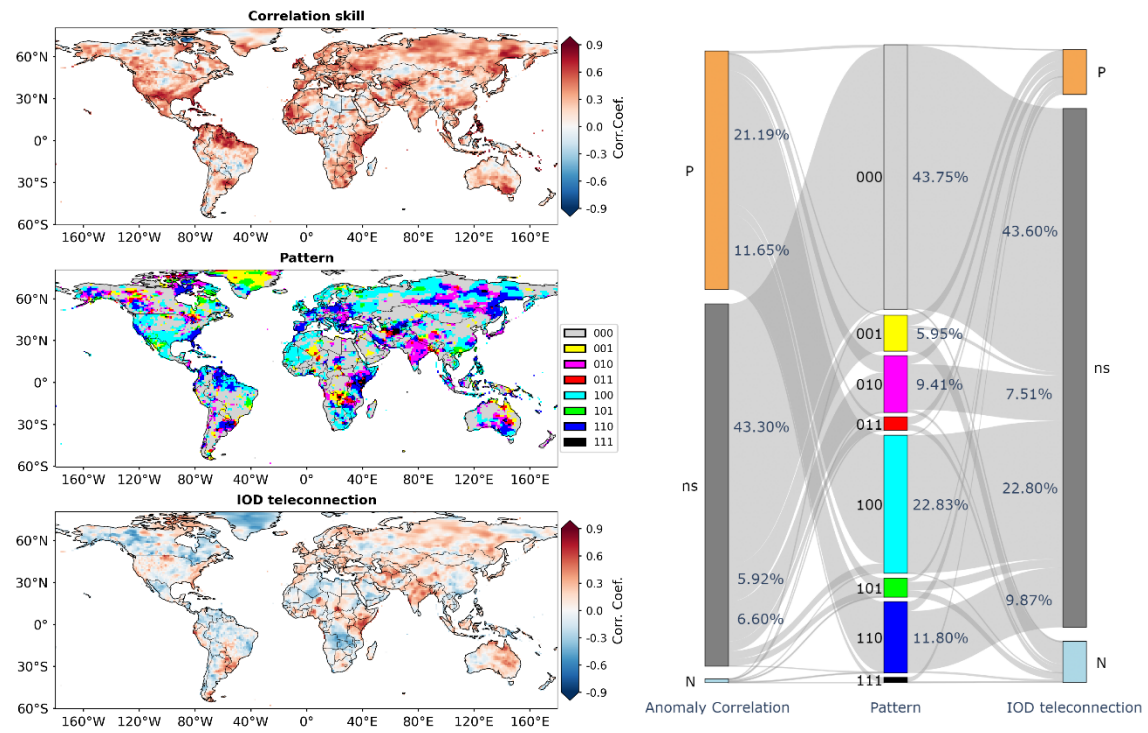

**Figure S21. As for Figure 12, but for IOD in DJF**

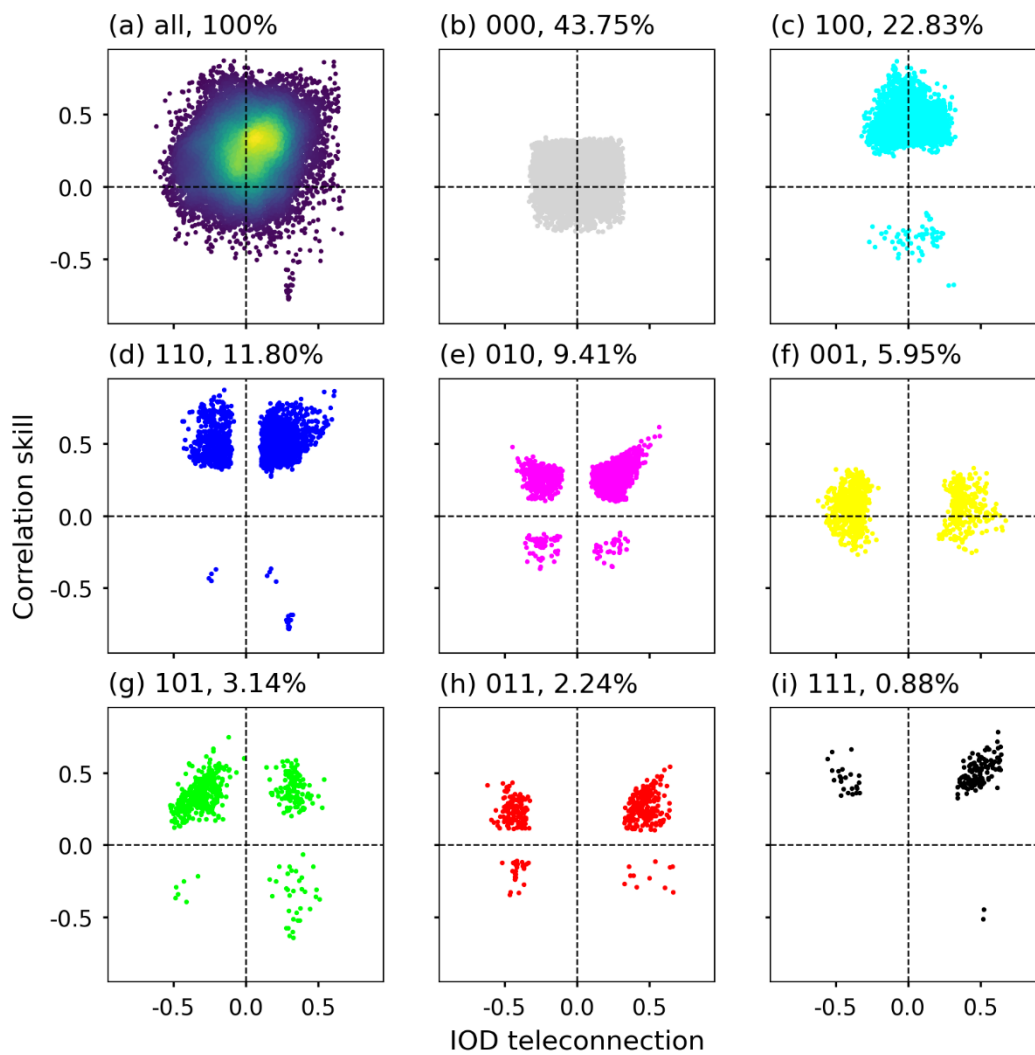

**Figure S22. As for Figure 12, but for IOD in DJF**
